# Supplementary material
Source: publisher figshare collection journal article supplement (https://geolsoc.figshare.com/ndownloader/files/5424047)
Supplement: Supplementary file 1 [file 5424047]

Table for U-Pb geochronologic analyses.
							Isotope ratios						Apparent ages (Ma)
Analysis	U	206Pb	U/Th	206Pb*	±	207Pb*	±	206Pb*	±	error	206Pb*	±	207Pb*	±	206Pb*	±	Best age	±	Conc
	(ppm)	204Pb		207Pb*	(%)	235U*	(%)	238U	(%)	corr.	238U*	(Ma)	235U	(Ma)	207Pb*	(Ma)	(Ma)	(Ma)	(%)
SM11-051-1	69	103968	2.3	5.7996	0.4	11.8181	2.6	0.4971	2.6	0.99	2601.3	55.5	2590.1	24.5	2581.3	6.2	2581.3	6.2	100.8
SM11-051-2	250	277608	2.6	8.1629	0.2	6.2126	0.8	0.3678	0.8	0.98	2019.1	13.4	2006.2	6.9	1993.0	3.0	1993.0	3.0	101.3
SM11-051-3	285	447384	0.8	6.1370	0.1	10.5291	0.5	0.4686	0.5	0.99	2477.6	10.2	2482.5	4.6	2486.5	1.3	2486.5	1.3	99.6
SM11-051-5	121	457338	1.0	5.8468	0.1	11.5507	0.6	0.4898	0.5	0.98	2569.8	11.5	2568.7	5.2	2567.8	2.0	2567.8	2.0	100.1
SM11-051-6	112	190543	2.3	8.4997	0.6	5.6487	1.1	0.3482	1.0	0.84	1926.1	15.9	1923.6	9.8	1920.8	11.1	1920.8	11.1	100.3
SM11-051-7	210	199961	1.3	9.3043	0.2	4.5894	1.4	0.3097	1.4	0.99	1739.2	21.5	1747.3	11.9	1757.1	3.7	1757.1	3.7	99.0
SM11-051-8	114	130877	2.2	7.2927	0.5	7.8489	1.1	0.4151	1.0	0.90	2238.4	19.0	2213.8	10.1	2191.2	8.5	2191.2	8.5	102.2
SM11-051-9	150	155627	1.7	6.8691	0.2	8.6929	1.4	0.4331	1.4	0.99	2319.5	27.5	2306.3	13.0	2294.6	4.0	2294.6	4.0	101.1
SM11-051-10	154	445884	1.7	8.7407	0.3	5.4537	1.2	0.3457	1.2	0.97	1914.2	19.6	1893.3	10.5	1870.5	5.4	1870.5	5.4	102.3
SM11-051-100	477	395977	1.7	6.1569	0.8	10.9340	7.5	0.4882	7.5	0.99	2563.1	157.8	2517.5	69.9	2481.0	13.4	2481.0	13.4	103.3
SM11-051-11	165	423611	2.0	8.7400	0.4	5.3322	1.7	0.3380	1.6	0.97	1877.0	26.2	1874.0	14.2	1870.7	7.9	1870.7	7.9	100.3
SM11-051-12	340	343874	1.0	8.3696	0.1	5.8415	1.0	0.3546	1.0	0.99	1956.5	16.9	1952.6	8.8	1948.4	2.4	1948.4	2.4	100.4
SM11-051-13	322	441850	2.0	8.7424	0.2	5.3587	2.4	0.3398	2.4	1.00	1885.6	38.5	1878.3	20.2	1870.2	3.2	1870.2	3.2	100.8
SM11-051-14	132	149244	0.9	8.7552	0.4	5.2433	1.0	0.3329	0.9	0.89	1852.6	13.9	1859.7	8.3	1867.6	7.9	1867.6	7.9	99.2
SM11-051-15	215	528549	1.8	9.2973	0.1	4.6997	2.4	0.3169	2.4	1.00	1774.6	37.1	1767.2	20.0	1758.4	2.6	1758.4	2.6	100.9
SM11-051-16	79	140133	1.8	6.0888	0.2	10.7614	1.9	0.4752	1.9	0.99	2506.4	39.3	2502.7	17.7	2499.7	3.4	2499.7	3.4	100.3
SM11-051-17	391	437016	0.7	8.8339	0.1	5.0235	1.3	0.3219	1.3	1.00	1798.8	21.1	1823.3	11.4	1851.4	1.9	1851.4	1.9	97.2
SM11-051-18	96	200414	1.5	5.9646	0.3	11.0897	1.1	0.4797	1.0	0.97	2526.1	21.5	2530.7	9.8	2534.4	4.2	2534.4	4.2	99.7
SM11-051-19	80	256622	0.6	6.4510	0.4	9.4340	1.7	0.4414	1.7	0.97	2356.8	32.7	2381.1	15.6	2402.0	6.6	2402.0	6.6	98.1
SM11-051-20	174	540813	1.8	8.3765	0.4	5.7733	1.0	0.3507	0.9	0.90	1938.1	15.9	1942.4	9.1	1947.0	8.0	1947.0	8.0	99.5
SM11-051-21	165	299264	2.4	6.1467	0.1	10.4822	2.0	0.4673	2.0	1.00	2471.7	41.8	2478.3	18.9	2483.8	1.7	2483.8	1.7	99.5
SM11-051-22	48	109567	1.2	6.3936	0.9	9.6564	2.4	0.4478	2.3	0.93	2385.4	45.3	2402.6	22.4	2417.2	14.7	2417.2	14.7	98.7
SM11-051-24	250	21371	1.8	8.2960	0.2	5.3908	2.4	0.3244	2.4	1.00	1811.0	38.6	1883.4	21.0	1964.2	2.9	1964.2	2.9	92.2
SM11-051-25	188	175287	2.7	7.7980	0.3	6.7560	1.3	0.3821	1.3	0.98	2086.1	22.4	2080.0	11.4	2073.9	5.0	2073.9	5.0	100.6
SM11-051-26	221	345736	6.5	8.2665	0.2	6.1271	2.3	0.3673	2.3	1.00	2016.9	39.3	1994.1	19.9	1970.6	3.4	1970.6	3.4	102.4
SM11-051-27	186	617371	1.8	7.2966	0.2	7.5895	0.8	0.4016	0.7	0.95	2176.6	13.6	2183.6	7.0	2190.2	4.3	2190.2	4.3	99.4
SM11-051-28	344	872215	19.6	8.4469	0.2	5.6942	1.0	0.3488	1.0	0.98	1929.1	16.9	1930.5	8.9	1932.0	3.5	1932.0	3.5	99.8
SM11-051-29	170	410083	2.6	8.0971	0.2	6.1927	0.9	0.3637	0.9	0.97	1999.5	15.7	2003.4	8.2	2007.4	3.9	2007.4	3.9	99.6
SM11-051-30	166	133501	1.3	8.2850	0.8	5.7888	4.9	0.3478	4.8	0.99	1924.3	80.3	1944.7	42.3	1966.6	13.5	1966.6	13.5	97.9
SM11-051-31	237	462274	3.6	8.3141	0.2	5.7745	1.6	0.3482	1.5	0.99	1926.0	25.6	1942.6	13.4	1960.3	3.9	1960.3	3.9	98.2
SM11-051-32	57	92429	1.2	5.3700	0.3	13.1937	2.3	0.5139	2.3	0.99	2673.1	50.4	2693.6	21.9	2709.0	5.0	2709.0	5.0	98.7
SM11-051-33	335	737500	4.0	8.0477	0.1	6.0882	0.9	0.3554	0.9	1.00	1960.1	14.7	1988.6	7.6	2018.2	1.5	2018.2	1.5	97.1
SM11-051-35	120	137665	1.1	8.8549	0.3	5.1327	1.4	0.3296	1.4	0.97	1836.6	22.5	1841.5	12.3	1847.1	6.0	1847.1	6.0	99.4
SM11-051-36	227	369921	1.9	8.2323	0.2	5.9183	1.6	0.3534	1.6	0.99	1950.6	26.9	1963.9	13.9	1977.9	2.9	1977.9	2.9	98.6
SM11-051-37	110	119173	1.2	8.7430	0.4	5.1419	2.7	0.3260	2.7	0.99	1819.2	42.8	1843.1	23.2	1870.1	6.9	1870.1	6.9	97.3
SM11-051-38	105	381516	1.0	5.9627	0.2	11.0182	2.0	0.4765	2.0	1.00	2512.0	41.2	2524.7	18.5	2534.9	3.2	2534.9	3.2	99.1
SM11-051-39	189	369180	2.3	6.4648	0.1	9.6292	0.6	0.4515	0.6	0.97	2401.8	12.2	2400.0	5.7	2398.4	2.4	2398.4	2.4	100.1
SM11-051-40	290	627567	2.9	6.2186	0.1	10.3474	0.9	0.4667	0.8	0.99	2469.0	17.3	2466.4	7.9	2464.2	2.3	2464.2	2.3	100.2
SM11-051-41	183	201823	1.5	8.6573	0.3	5.3666	1.4	0.3370	1.3	0.97	1872.0	21.6	1879.5	11.7	1887.8	5.6	1887.8	5.6	99.2
SM11-051-42	162	343936	1.2	5.9714	0.1	11.1367	1.0	0.4823	1.0	1.00	2537.3	20.1	2534.6	9.0	2532.4	1.5	2532.4	1.5	100.2
SM11-051-44	304	578764	2.4	7.1025	3.1	7.2336	3.6	0.3726	2.0	0.54	2041.7	34.2	2140.7	32.5	2237.0	53.2	2237.0	53.2	91.3
SM11-051-45	116	233377	0.8	8.4739	0.4	5.6775	1.0	0.3489	0.9	0.91	1929.5	14.6	1927.9	8.3	1926.3	7.1	1926.3	7.1	100.2
SM11-051-46	73	95856	0.9	6.0566	0.3	10.7013	1.7	0.4701	1.7	0.98	2483.9	34.4	2497.5	15.7	2508.7	5.0	2508.7	5.0	99.0
SM11-051-47	145	499653	2.7	6.8461	0.3	8.5332	3.0	0.4237	3.0	1.00	2277.2	57.1	2289.5	27.2	2300.4	4.5	2300.4	4.5	99.0
SM11-051-48	83	213026	2.0	6.0522	0.4	10.8884	1.9	0.4779	1.9	0.98	2518.3	39.5	2513.6	18.0	2509.9	6.5	2509.9	6.5	100.3
SM11-051-49	126	422197	2.1	8.2139	0.3	6.0450	0.8	0.3601	0.8	0.95	1982.7	13.1	1982.3	7.0	1981.9	4.7	1981.9	4.7	100.0
SM11-051-50	94	156505	2.5	8.3275	0.6	5.8675	1.4	0.3544	1.3	0.92	1955.5	21.6	1956.4	12.1	1957.5	9.8	1957.5	9.8	99.9
SM11-051-51	284	252513	1.8	6.8273	0.2	8.5021	1.1	0.4210	1.1	0.99	2265.0	21.2	2286.2	10.2	2305.1	2.7	2305.1	2.7	98.3
SM11-051-52	136	344997	2.5	8.1867	0.4	6.0479	1.1	0.3591	1.0	0.94	1977.9	17.3	1982.8	9.4	1987.8	6.6	1987.8	6.6	99.5
SM11-051-53	295	626348	2.5	8.0040	0.2	6.4292	2.1	0.3732	2.1	1.00	2044.5	36.8	2036.3	18.5	2027.9	2.9	2027.9	2.9	100.8
SM11-051-54	219	790358	1.7	6.4058	0.3	9.8151	2.3	0.4560	2.3	0.99	2421.9	46.4	2417.6	21.3	2413.9	4.3	2413.9	4.3	100.3
SM11-051-55	68	193958	0.8	6.0582	0.4	10.9783	1.9	0.4824	1.9	0.98	2537.6	39.4	2521.3	17.9	2508.2	6.7	2508.2	6.7	101.2
SM11-051-56	97	347059	1.4	5.9614	0.2	11.0187	3.2	0.4764	3.2	1.00	2511.6	65.8	2524.7	29.6	2535.3	3.9	2535.3	3.9	99.1
SM11-051-57	101	1659868	1.4	5.9855	0.1	10.1793	1.1	0.4419	1.1	0.99	2359.1	21.4	2451.2	10.1	2528.5	1.9	2528.5	1.9	93.3
SM11-051-58	74	220536	1.2	5.9508	0.2	11.0929	1.3	0.4788	1.3	0.98	2521.9	26.2	2531.0	11.9	2538.2	3.9	2538.2	3.9	99.4
SM11-051-59	136	265787	0.9	6.0176	0.2	10.7115	0.5	0.4675	0.4	0.92	2472.6	8.8	2498.4	4.3	2519.5	3.0	2519.5	3.0	98.1
SM11-051-60	199	811994	4.5	6.1113	0.2	10.6384	0.8	0.4715	0.8	0.96	2490.3	15.7	2492.1	7.4	2493.5	3.8	2493.5	3.8	99.9
SM11-051-61	77	166663	1.3	6.2955	0.3	10.0649	1.9	0.4596	1.9	0.99	2437.6	38.1	2440.8	17.5	2443.4	4.6	2443.4	4.6	99.8
SM11-051-62	143	145547	2.6	8.7131	0.2	5.2939	1.0	0.3345	1.0	0.98	1860.3	16.6	1867.9	8.9	1876.3	3.6	1876.3	3.6	99.2
SM11-051-63	172	195103	0.8	6.0010	0.3	9.7770	3.3	0.4255	3.3	1.00	2285.5	63.1	2414.0	30.4	2524.1	5.1	2524.1	5.1	90.5
SM11-051-64	204	218648	1.2	6.1074	0.2	9.9396	1.7	0.4403	1.7	0.99	2351.9	32.8	2429.2	15.4	2494.6	3.2	2494.6	3.2	94.3
SM11-051-65	118	55903	2.4	6.1208	0.3	10.3372	0.9	0.4589	0.9	0.95	2434.7	18.2	2465.4	8.8	2490.9	5.2	2490.9	5.2	97.7
SM11-051-66	106	241299	1.7	5.9885	0.2	11.1453	1.1	0.4841	1.1	0.99	2545.0	22.9	2535.4	10.3	2527.7	2.8	2527.7	2.8	100.7
SM11-051-67	40	126783	0.9	5.3499	0.6	13.7749	1.7	0.5345	1.6	0.93	2760.3	34.9	2734.4	15.9	2715.2	10.5	2715.2	10.5	101.7
SM11-051-68	262	1482994	1.5	5.8599	0.2	11.4388	2.3	0.4861	2.3	1.00	2554.0	48.5	2559.6	21.6	2564.0	3.7	2564.0	3.7	99.6
SM11-051-69	232	435964	1.8	8.5699	0.2	5.5332	2.7	0.3439	2.7	1.00	1905.5	45.1	1905.8	23.6	1906.1	3.5	1906.1	3.5	100.0
SM11-051-70	238	417133	1.0	5.7509	0.2	12.3628	3.4	0.5156	3.4	1.00	2680.7	75.2	2632.4	32.3	2595.4	2.9	2595.4	2.9	103.3
SM11-051-71	156	161265	1.6	9.3513	0.5	4.6022	1.5	0.3121	1.4	0.95	1751.2	22.2	1749.7	12.7	1747.8	8.9	1747.8	8.9	100.2
SM11-051-72	83	186231	0.6	6.0940	0.2	10.6559	1.4	0.4710	1.4	0.99	2487.8	28.0	2493.6	12.8	2498.3	3.8	2498.3	3.8	99.6
SM11-051-73	419	155123	2.7	8.8089	0.2	4.7609	1.7	0.3042	1.7	1.00	1711.9	26.2	1778.0	14.7	1856.5	2.9	1856.5	2.9	92.2
SM11-051-74	359	311973	3.6	8.7147	0.1	5.2273	1.4	0.3304	1.4	1.00	1840.3	23.1	1857.1	12.4	1875.9	2.2	1875.9	2.2	98.1
SM11-051-75	329	542113	2.7	8.0464	0.1	6.3947	1.5	0.3732	1.5	1.00	2044.4	25.6	2031.5	12.9	2018.5	2.3	2018.5	2.3	101.3
SM11-051-76	47	181447	1.0	6.1211	0.6	10.5850	0.8	0.4699	0.6	0.73	2483.2	12.6	2487.4	7.8	2490.8	9.6	2490.8	9.6	99.7
SM11-051-77	166	280763	1.5	6.6183	0.3	8.8049	1.3	0.4226	1.2	0.97	2272.4	23.6	2318.0	11.6	2358.4	5.2	2358.4	5.2	96.4
SM11-051-78	150	251402	1.4	7.2121	0.2	8.1335	5.0	0.4254	5.0	1.00	2285.1	97.1	2246.0	45.7	2210.5	4.2	2210.5	4.2	103.4
SM11-051-79	221	120020	1.2	9.4926	0.3	4.4238	1.8	0.3046	1.8	0.98	1713.9	27.2	1716.8	15.2	1720.3	5.9	1720.3	5.9	99.6
SM11-051-80	133	192259	1.6	8.1475	0.4	6.1280	0.8	0.3621	0.7	0.87	1992.2	11.6	1994.2	6.8	1996.4	7.0	1996.4	7.0	99.8
SM11-051-81	58	157611	1.7	8.5787	0.4	5.4276	1.4	0.3377	1.3	0.95	1875.6	21.0	1889.2	11.6	1904.2	7.6	1904.2	7.6	98.5
SM11-051-82	324	505496	6.2	6.2747	0.6	9.8323	1.6	0.4474	1.4	0.91	2383.9	28.8	2419.2	14.6	2449.0	10.9	2449.0	10.9	97.3
SM11-051-83	224	398474	1.1	8.4961	0.2	5.6734	0.7	0.3496	0.7	0.95	1932.6	11.2	1927.3	6.1	1921.6	4.1	1921.6	4.1	100.6
SM11-051-84	235	235442	1.5	8.7691	0.2	5.0520	0.9	0.3213	0.8	0.96	1796.1	12.8	1828.1	7.2	1864.7	4.4	1864.7	4.4	96.3
SM11-051-85	94	198893	2.4	8.3135	0.7	5.8504	1.0	0.3528	0.7	0.73	1947.7	12.1	1953.9	8.5	1960.5	11.9	1960.5	11.9	99.4
SM11-051-86	228	297732	2.0	8.4708	0.2	5.7636	1.2	0.3541	1.1	0.99	1954.1	19.3	1941.0	10.1	1926.9	3.3	1926.9	3.3	101.4
SM11-051-87	54	131367	1.1	5.9553	0.4	11.0528	2.1	0.4774	2.0	0.98	2515.9	41.9	2527.6	19.2	2537.0	7.2	2537.0	7.2	99.2
SM11-051-88	165	148164	2.4	8.0792	0.3	6.0593	1.0	0.3550	0.9	0.95	1958.6	15.9	1984.4	8.6	2011.3	5.4	2011.3	5.4	97.4
SM11-051-89	635	55520	2.9	8.8557	0.2	4.3168	1.3	0.2773	1.3	0.99	1577.5	18.3	1696.6	10.9	1846.9	3.0	1846.9	3.0	85.4
SM11-051-90	156	372271	1.7	7.3191	0.2	7.4171	1.8	0.3937	1.8	0.99	2140.1	32.6	2163.0	16.1	2184.9	3.2	2184.9	3.2	97.9
SM11-051-91	156	308448	2.7	6.2425	0.5	9.8457	3.1	0.4458	3.1	0.99	2376.4	60.7	2420.4	28.5	2457.7	8.2	2457.7	8.2	96.7
SM11-051-92	196	389754	4.3	8.6751	0.3	5.3011	2.2	0.3335	2.2	0.99	1855.5	35.4	1869.0	18.9	1884.1	4.7	1884.1	4.7	98.5
SM11-051-93	77	99779	2.4	8.6873	0.7	5.3597	2.8	0.3377	2.8	0.97	1875.6	44.8	1878.4	24.3	1881.6	12.2	1881.6	12.2	99.7
SM11-051-94	56	147268	0.9	5.6516	0.3	11.9829	2.0	0.4912	1.9	0.99	2575.8	40.8	2603.1	18.3	2624.4	5.6	2624.4	5.6	98.1
SM11-051-95	81	86304	1.2	8.7753	0.6	5.2137	2.4	0.3318	2.3	0.97	1847.2	37.3	1854.9	20.5	1863.4	11.2	1863.4	11.2	99.1
SM11-051-96	179	308594	1.8	5.9595	0.2	11.0705	2.9	0.4785	2.9	1.00	2520.7	61.3	2529.1	27.4	2535.8	4.1	2535.8	4.1	99.4
SM11-051-97	85	154796	1.6	6.0852	0.3	10.6747	1.9	0.4711	1.9	0.99	2488.5	38.4	2495.2	17.5	2500.7	4.4	2500.7	4.4	99.5
SM11-051-98	132	144282	1.9	5.8858	0.2	11.5375	4.0	0.4925	4.0	1.00	2581.6	84.8	2567.6	37.3	2556.6	3.7	2556.6	3.7	101.0
SM11-051-99	216	291222	1.8	5.9686	0.1	11.0450	2.3	0.4781	2.3	1.00	2519.1	47.0	2526.9	21.0	2533.2	1.7	2533.2	1.7	99.4
